# Supplementary material for: Transcriptome-wide Analysis of Exosome Targets
Source: PubMed Central journal article supplement (PMC3526797; doi:10.1016/j.molcel.2012.08.013), 2012-11-09
Supplement: mmc1.pdf [file mmc1.pdf]

**Molecular Cell, Volume 48**

**Supplemental Information**

**Transcriptome-wide Analysis of Exosome Targets**

**Claudia Schneider, Grzegorz Kudla, Wiebke Wlotzka, Alex Tuck, and David Tollervey**

**Table S1: Oligonucleotides used in these studies.**

Oligonucleotides are indicated (5'-3'), rN indicates RNA nucleotide

Construction of Rrp44-HTP plasmids, derived from Rrp44-szz (Schneider et al., 2009)

|                                   |                                                                  |
|-----------------------------------|------------------------------------------------------------------|
| Rrp44-genF                        | ACGTA <sup>r</sup> CTCGAGGAATATATCCTTTTGA <sup>r</sup> ACTGGAGTG |
| Rrp44-gen(URA)R                   | ACGTA <sup>r</sup> CTCGAGGCTGGATGGGAAGCGTACC                     |
| Rrp44-His <sub>6</sub> -overlap-F | GAGAAGCCACCATCACCATCACCATACTGCTAGCGAGAATTTG                      |
| Rrp44-His <sub>6</sub> -overlap-R | GTAAAATCCATGGAAAAGAGAAGCCACCATCACCATCACCAT                       |

Insertion of a PreScission Protease (PP) cleavage site into Rrp44-HTP or Rrp44-szz plasmids

|                              |                                                                                          |
|------------------------------|------------------------------------------------------------------------------------------|
| Rrp44-PP-F                   | CTGGAAGTTCTGTTCCAGGGGCCCGATAAAGATCTTGAAAGGG<br>ACACATTTTCAG                              |
| Rrp44-PP-R                   | GGGCCCTGGAACAGA <sup>r</sup> ACTTCCAGAAAAGAATCCATTTGAGGAATA<br>GAGTCTCTG                 |
| Rrp44-His <sub>6</sub> -PP-F | CACCATCACCATCACCATCTGGAAGTTCTGTTCCAGGGGCCCGA<br>TAAAGATCTTGAAAGGGACACATTTTCAG            |
| Rrp44-His <sub>6</sub> -PP-R | GGGCCCTGGAACAGA <sup>r</sup> ACTTCCAGATGGTGTGGTGTGGTG<br>AAAAGAATCCATTTGAGGAATAGAGTCTCTG |

Construction of HTP-tagged yeast strains

|                 |                                                                                    |
|-----------------|------------------------------------------------------------------------------------|
| Rrp41-HTP-F     | GGAAACATGCTCAGAAAAGAGTCAGTAACGCCTCTGCTAGGG<br>AGCACCATCACCATCACC                   |
| Rrp41-TAP-R     | ACTTTTATATAAACAGTGGCAATTAATGGCGTTTTTTATTTACG<br>ACTCACTATAGGG                      |
| Csl4-HTP-F      | TTACAGGCGCTACAGAAAAGCGCAAATGTGCCAAACCTTTTG<br>AGCACCATCACCATCACC                   |
| Csl4-TAP-R      | TATATACGCGTCTATATGCACTGTAGATAAGCTGTTACATATA<br>CGACTCACTATAGGG                     |
| Rrp6-HTP-F      | AAAGAGGAGGCCTGCCGCCAAAGGTAAGAATCTGTCATTTAA<br>AAGGTCCATGGAGCACCATC                 |
| Rrp6-TAP-R      | TA <sup>r</sup> ACTCCATGACACAGATATTCGATTAGATGAATTTAGAGGTC<br>TTAATACGACTCACTATAGGG |
| pBS1539-HTP-URA | plasmid for HTP tagging, Granneman <i>et al.</i> , 2009                            |

CRAC 5' linkers (IDT)

|      |                                                                    |
|------|--------------------------------------------------------------------|
| 5'L  | 5InvddT/GTTCArGrArGrUrUrCrUrArCrArGrUrCrCrGrArCrGrArUrC            |
| L5c  | 5InvddT/ACACrGrArCrGrCrUrCrUrUrCrCrGrArUrCrUrGrA                   |
| L5d  | 5InvddT/ACACrGrArCrGrCrUrCrUrUrCrCrGrArUrCrUrArCrArGrC             |
| L5e  | 5InvddT/ACACrGrArCrGrCrUrCrUrUrCrCrGrArUrCrUrCrArCrArGrC           |
| L5f  | 5InvddT/ACACrGrArCrGrCrUrCrUrUrCrCrGrArUrCrUrGrCrGrArGrC           |
| L5Aa | 5InvddT/ACACrGrArCrGrCrUrCrUrUrCrCrGrArUrCrUrNrNrNrUrArArGrC       |
| L5Ad | 5InvddT/ACACrGrArCrGrCrUrCrUrUrCrCrGrArUrCrUrNrNrNrCrGrCrUrUrArGrC |

CRAC 3' pre-activated, adenylated cloning linker (IDT)

|                              |                                 |
|------------------------------|---------------------------------|
| miRCat-33 <sup>TM</sup> 3'-L | rAppTGGAAATTCTCGGGTGCCAAGG/ddC/ |
|------------------------------|---------------------------------|

### CRAC RT and PCR

miRCat-33™ RT CCTTGGCACCCGAGAATT  
PCR-F1 AATGATACTGCGACCACCGACAGGTTTCAGAGTTCTACAGTCCGA  
PCR-R1 CAAGCAGAAGACGGCATAACGA  
PCR-F2 AATGATACGGCGACCACCGAGATCTACACTCTTTCCCTACACGA  
CGCTCTTCCGATCT  
PCR-R2 CAAGCAGAAGACGGCATAACGAGATCGGTCTCGGCATTCTGGC  
CTTGGCACCCGAGAATTCC

### Northern probes

#304 anti-tRNA<sup>Pro</sup>(UGG) mature ACCCAGGGCCTCTCG  
#305 anti-tRNA<sup>Trp</sup>(CCA) mature AACCTGCAACCCTTCGA  
W331 anti-tRNA<sup>Arg</sup>(UCU) mature GGGGTCGAACCCATAATCTT  
#250 anti-scr1 ATCCCGGCCGCTCCATCAC  
#261 anti-U6 snRNA AAAACGAAATAAATTCTTTGTAAAAC

**Table S2: Yeast strains used in these studies.**

|                              |                                                                                 |                                |
|------------------------------|---------------------------------------------------------------------------------|--------------------------------|
| BY4741                       | <i>MATa; his3Δ1; leu2Δ0; lys2Δ0; ura3Δ0</i>                                     | Euroscarf                      |
| <i>Δrrp44</i> shuffle strain | <i>MATa; his3Δ1; leu2Δ0; lys2Δ0; ura3Δ0; rrp44Δ::kanMX6; [pRS316/RRP44-szz]</i> | (Schneider et al., 2009)       |
| <i>Gal::rrp44</i>            | <i>MATa; his3Δ1; leu2Δ0; lys2Δ0; ura3Δ0, His3MX6-pGAL1-3HA::rrp44</i>           | (Houseley and Tollervey, 2006) |
| Trf4-HTP                     | <i>MATa; his3Δ1; leu2Δ0; lys2Δ0; ura3Δ0; TRF4-HTP-URA3</i>                      | (Wlotzka et al., 2011)         |
| Rrp6-HTP                     | <i>MATa; his3Δ1; leu2Δ0; lys2Δ0; ura3Δ0; RRP6-HTP-URA3</i>                      | This study                     |
| Csl4-HTP                     | <i>MATa; his3Δ1; leu2Δ0; lys2Δ0; ura3Δ0; CSL4-HTP-URA3</i>                      | This study                     |
| Rrp41-HTP                    | <i>MATa; his3Δ1; leu2Δ0; lys2Δ0; ura3Δ0; RRP41-HTP-URA3</i>                     | This study                     |

### Supplementary References

Gietz, D., St. Jean, A., Woods, R.A., and Schiestl, R.H. (1992). Improved method for high efficiency transformation of intact yeast cells. *Nucleic Acids Res.* 20, 1425.  
Granneman, S., Kudla, G., Petfalski, E., and Tollervey, D. (2009). Identification of protein binding sites on U3 snoRNA and pre-rRNA by UV cross-linking and high throughput analysis of cDNAs. *Proc. Natl. Acad. Sci. U.S.A.* 106, 9613-9818.  
Granneman, S., Petfalski, E., and Tollervey, D. (2011). A cluster of ribosome synthesis factors regulate 5.8S rRNA maturation. *EMBO J.* 30, 4006-4019.  
Houseley, J., and Tollervey, D. (2006). Yeast Trf5p is a nuclear poly(A) polymerase. *EMBO Rep.* 7, 205-211.  
Schneider, C., Anderson, J.T., and Tollervey, D. (2007). The exosome subunit Rrp44 plays a direct role in RNA substrate recognition. *Mol. Cell* 27, 324-331.  
Schneider, C., Leung, E., Brown, J., and Tollervey, D. (2009). The N-terminal PIN domain of the exosome subunit Rrp44 harbors endonuclease activity and tethers Rrp44 to the yeast core exosome. *Nucleic Acids Res* 37, 1127-1140.  
Wlotzka, W., Kudla, G., Granneman, S., and Tollervey, D. (2011). The nuclear RNA polymerase II surveillance system targets polymerase III transcripts. *EMBO J.* 30, 1790-1803.

**Table S3 (Excel file):**

**Hit densities on functionally grouped RNAs recovered with all individual biological replicate experiments**

Dataset used for making the heatmaps presented in Figures 1, 5, 6 and S1. Numbers of hits per million mapped reads are shown.

**Supplementary Figures:**

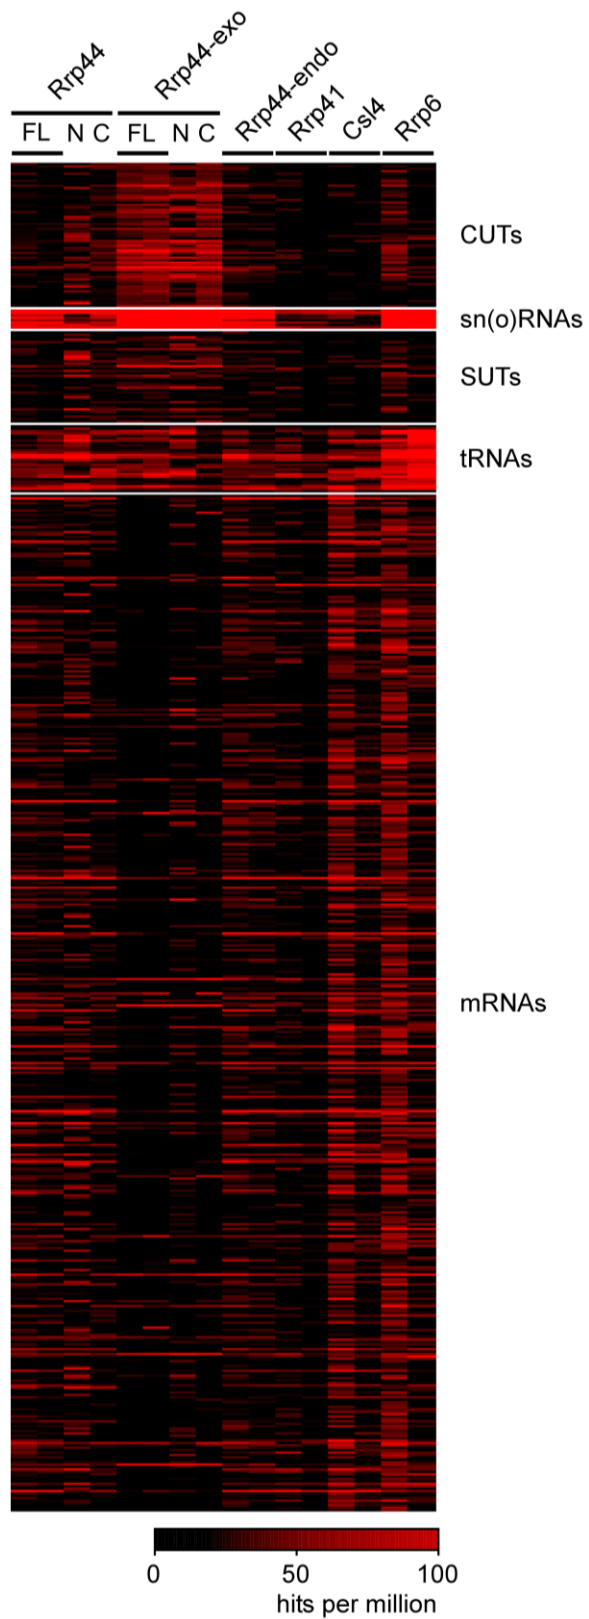

**Figure S1: Heat maps for main substrate groups and all individual biological replicate experiments.** Hits per million mapped reads of recovered RNAs are shown in shades of red.

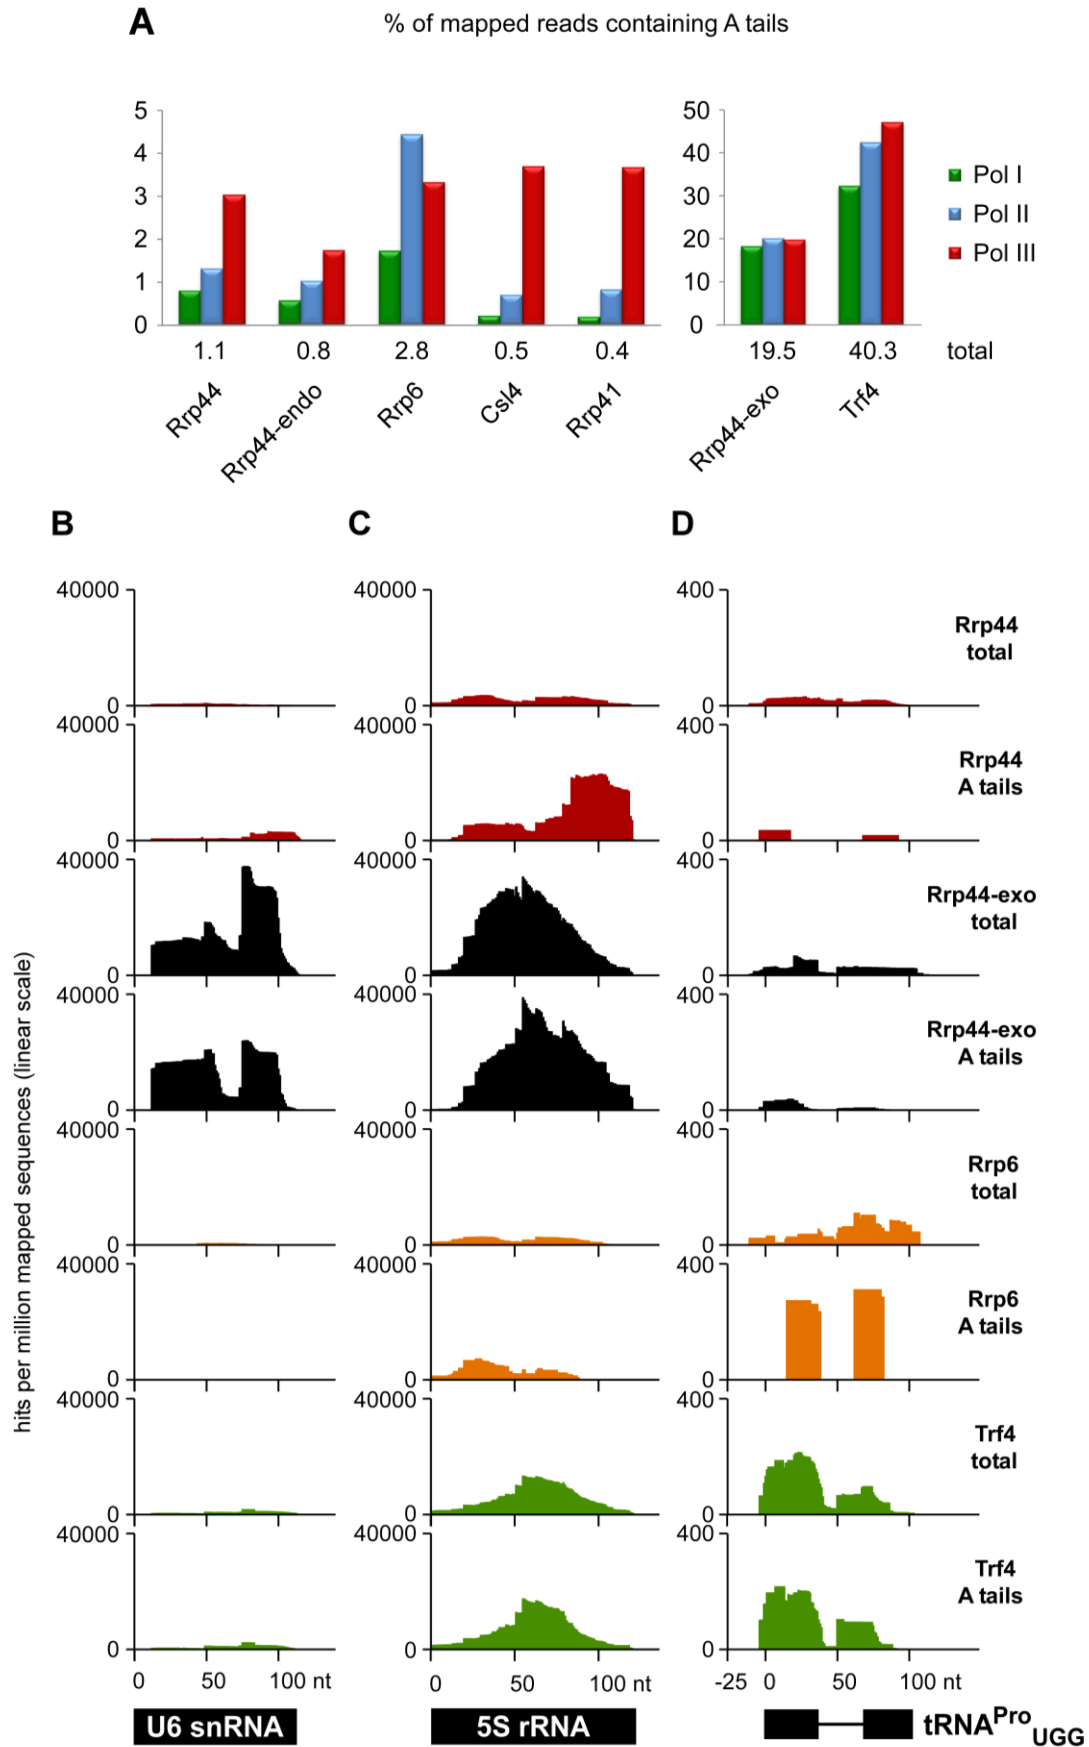

Figure S2

**Figure S2:**

**A: Frequencies of non-templated terminal oligo(A) sequence reads in core exosome, Rrp6 and Trf4 datasets.** Datasets are either filtered for total reads, or for Pol I, Pol II and Pol III transcripts, that contain 2 or more non-templated As.

**B, C, D: Oligoadenylated sequence reads derived from representative Pol III RNAs**

Densities of high-throughput sequencing reads, either unfiltered (total) or filtered for reads containing 2 or more non-templated As (A-tails), from Rrp44, Rrp44-exo, Rrp6 and Trf4 datasets were mapped to the U6 snRNA (B), 5S rRNA (C) and tRNA<sup>Pro</sup><sub>UGG</sub> (D).

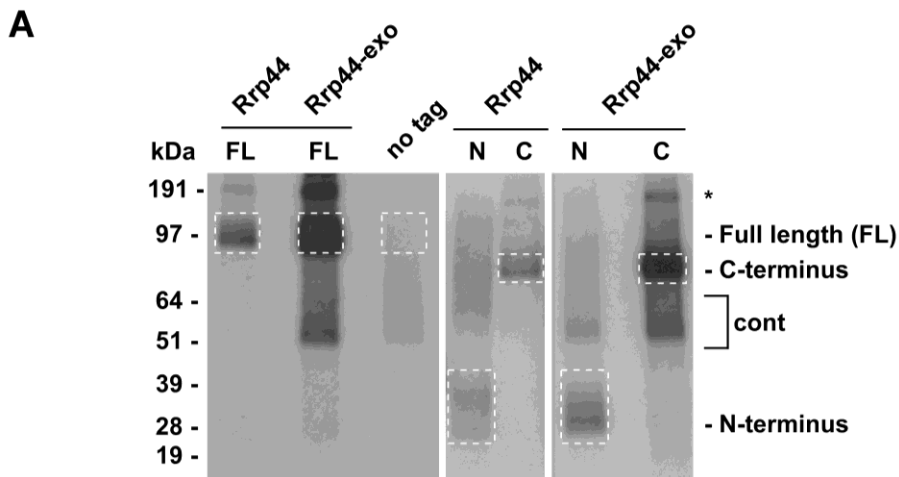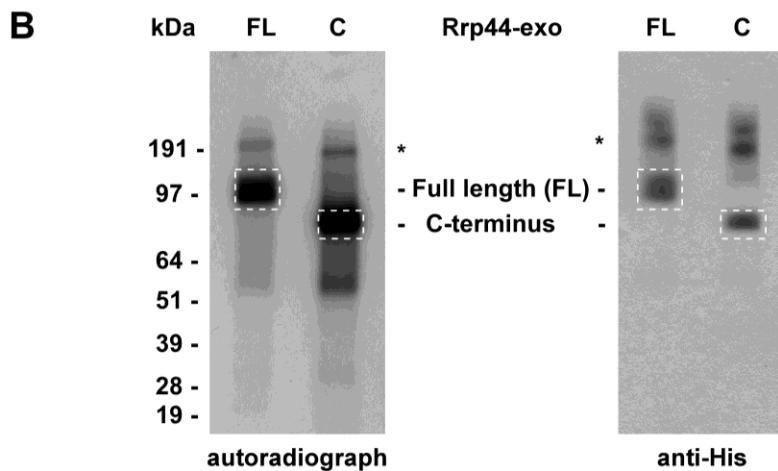

**Figure S3: Separation of full length Rrp44 and cleaved fragments**

**A:** Autoradiography of a denaturing SDS PAGE separating full length Rrp44 and N- and C-terminal fragments. Proteins purified from yeast strains expressing either wild type Rrp44 or the Rrp44-exo mutant are visualized by labeling of crosslinked RNA fragments. No tag: untagged strain; cont: common contaminant ~55 kDa band (Granneman *et al.*, 2009).

**B:** Full length Rrp44-exo and the cleaved C-terminal fragment are visualized by autoradiography (left, see panel A) or immunoblotting using an anti-His antibody (right).



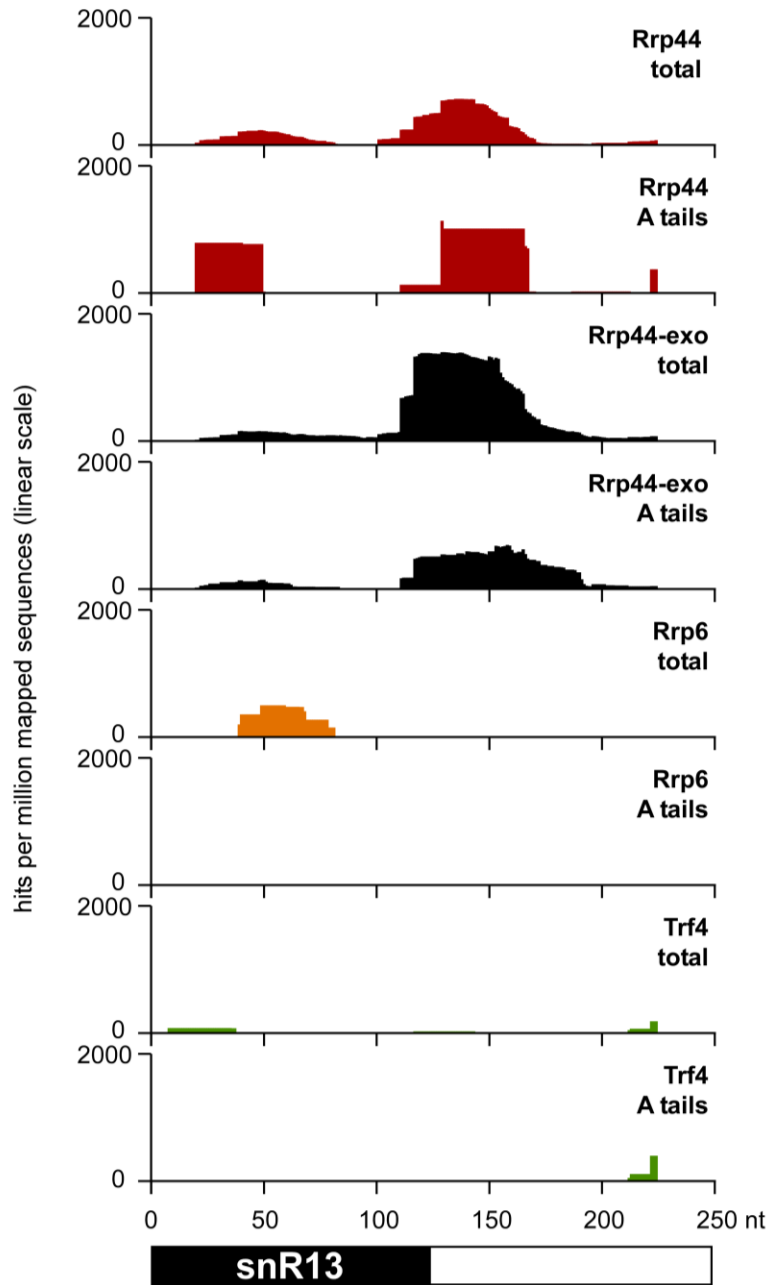

**Figure S4: Functional overlap between Rrp44 and Rrp6 on snR13**

Densities of high-throughput sequencing reads, either unfiltered (total) or filtered for reads containing 2 or more non-templated As (A-tails), from Rrp44, Rrp44-exo, Rrp6 and Trf4 datasets were mapped to the box C/D snoRNA snR13 (1-124 nt, black box) and downstream regions. The snoRNA terminator elements I and II are located at nt 125-190 (I) and nt 190-249 (II).

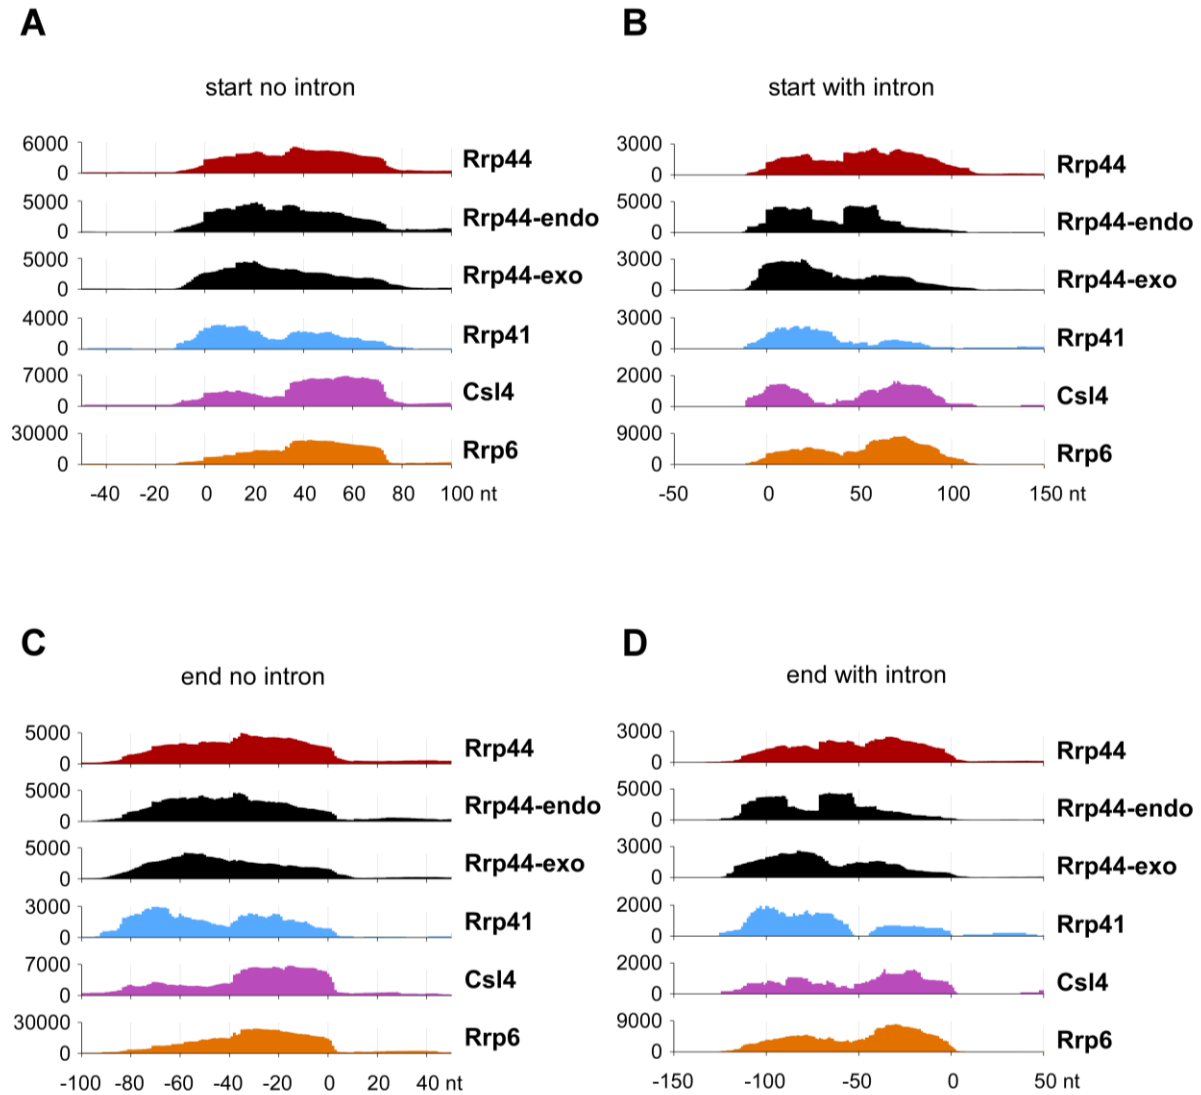

Y-scales: hits per million mapped sequences (linear scale)

**Figure S5: Distribution of high-throughput sequencing reads from core exosome and Rrp6 datasets over all yeast tRNA genes.**

All yeast tRNA genes were filtered by the presence or absence of an intron and aligned at either 5' or 3' end of the mature tRNAs (indicated as position 0 on the plots). Total hit densities per million mapped reads are indicated for the proteins tested. Note that different scales are used in the Y-axis, reflecting differences in overall tRNA association for the different proteins.
